# Supplementary material
Source: PubMed Central journal article supplement (PMC11276832)
Supplement: NIHMS899131-supplement-Supp1.pdf [file NIHMS899131-supplement-Supp1.pdf]

**ID# 03**

| Sample #   | 1      | 2      | 3      | 4      |
|------------|--------|--------|--------|--------|
| Sample Day | 1      | 15     | 20     | 22     |
| PFOS       | 8.172  | 8.258  | 9.252  | 7.653  |
| PFOA       | 0.9165 | 0.9557 | 1.115  | 0.9056 |
| PFHxS      | 0.5042 | 0.4659 | 0.627  | 0.4476 |
| PFNA       | 0.5496 | 0.5482 | 0.6336 | 0.5129 |
| PFDA       | 0.2625 | 0.2539 | 0.2796 | 0.2581 |
| PFUnA      | 0.1938 | 0.1916 | 0.2107 | 0.1933 |

**ID# 04**

| Sample #   | 1      | 2      | 3      | 4      |
|------------|--------|--------|--------|--------|
| Sample Day | 1      | 22     | 23     | 24     |
| PFOS       | 3.758  | 3.55   | 3.318  | 3.204  |
| PFOA       | 1.017  | 0.9553 | 0.8885 | 0.9111 |
| PFHxS      | 0.5724 | 0.6105 | 0.5235 | 0.5437 |
| PFNA       | 0.5519 | 0.5104 | 0.4734 | 0.4732 |
| PFDA       | 0.3963 | 0.3674 | 0.3415 | 0.3617 |
| PFUnA      | 0.3539 | 0.3088 | 0.2881 | 0.311  |

**ID# 05**

| Sample #   | 1      | 2      | 3      | 4      |
|------------|--------|--------|--------|--------|
| Sample Day | 1      | 14     | 23     | 24     |
| PFOS       | 7.224  | 7.226  | 8.754  | 6.499  |
| PFOA       | 1.819  | 1.576  | 1.885  | 1.507  |
| PFHxS      | 8.881  | 8.886  | 8.869  | 7.152  |
| PFNA       | 0.8498 | 0.8583 | 0.6872 | 0.7573 |
| PFDA       | 0.4825 | 0.4931 | 0.4863 | 0.4418 |
| PFUnA      | 0.5601 | 0.5252 | 0.5531 | 0.487  |

**ID# 15**

| Sample #   | 1      | 2      | 3      | 4      |
|------------|--------|--------|--------|--------|
| Sample Day | 1      | 13     | 22     | 25     |
| PFOS       | 4.565  | 4.697  | 3.788  | 3.918  |
| PFOA       | 1.997  | 1.928  | 1.71   | 1.723  |
| PFHxS      | 1.267  | 1.246  | 0.7641 | 0.9758 |
| PFNA       | 0.6687 | 0.8612 | 0.4115 | 0.5134 |
| PFDA       | 0.2705 | 0.2806 | 0.2016 | 0.235  |
| PFUnA      | 0.1034 | 0.0994 | 0.071  | 0.0871 |

**ID# 16**

| Sample #   | 1      | 2      | 3      | 4      |
|------------|--------|--------|--------|--------|
| Sample Day | 1      | 21     | 24     | 26     |
| PFOS       | 13.457 | 10.77  | 10.471 | 10.248 |
| PFOA       | 3.289  | 3.124  | 3.295  | 2.531  |
| PFHxS      | 4.134  | 3.863  | 3.508  | 3.736  |
| PFNA       | 1.069  | 1.019  | 1.029  | 0.9879 |
| PFDA       | 0.5823 | 0.5343 | 0.711  | 0.5301 |
| PFUnA      | 0.2778 | 0.2671 | 0.2737 | 0.2586 |

**ID# 19**

| Sample #   | 1      | 2      | 3      | 4      |
|------------|--------|--------|--------|--------|
| Sample Day | 1      | 5      | 8      | 12     |
| PFOS       | 4.808  | 6.432  | 4.428  | 6.694  |
| PFOA       | 4.238  | 4.093  | 4.022  | 3.907  |
| PFHxS      | 1.115  | 1.276  | 1.2    | 1.289  |
| PFNA       | 0.8601 | 0.9035 | 0.8155 | 0.8746 |
| PFDA       | 0.4112 | 0.4025 | 0.4125 | 0.4295 |
| PFUnA      | 0.1394 | 0.1344 | 0.1419 | 0.1459 |

**ID# 31**

| Sample #   | 1      | 2      | 3      | 4      |
|------------|--------|--------|--------|--------|
| Sample Day | 1      | 15     | 19     | 21     |
| PFOS       | 3.941  | 3.627  | 3.94   | 3.735  |
| PFOA       | 1.297  | 1.295  | 1.376  | 1.059  |
| PFHxS      | 1.253  | 0.71   | 0.7382 | 0.6708 |
| PFNA       | 0.4108 | 0.3865 | 0.3872 | 0.3856 |
| PFDA       | 0.2174 | 0.1985 | 0.2117 | 0.2043 |
| PFUnA      | 0.1248 | 0.1207 | 0.1244 | 0.1256 |

**ID# 32**

| Sample #   | 1      | 2      | 3      | 4      |
|------------|--------|--------|--------|--------|
| Sample Day | 1      | 6      | 8      | 12     |
| PFOS       | 4.026  | 4.408  | 4.646  | 5.705  |
| PFOA       | 1.303  | 1.107  | 1.112  | 0.9963 |
| PFHxS      | 0.5638 | 0.5199 | 0.4734 | 0.4325 |
| PFNA       | 0.4189 | 0.4184 | 0.4436 | 0.3732 |
| PFDA       | 0.2487 | 0.2353 | 0.2495 | 0.2432 |
| PFUnA      | 0.1088 | 0.1006 | 0.1013 | 0.0987 |

**ID# 43**

| Sample #   | 1      | 2      | 3      | 4      |
|------------|--------|--------|--------|--------|
| Sample Day | 1      | 7      | 10     | 12     |
| PFOS       | 5.78   | 6.006  | 4.814  | 6.589  |
| PFOA       | 2.829  | 2.456  | 2.714  | 2.634  |
| PFHxS      | 1.282  | 1.379  | 1.324  | 1.194  |
| PFNA       | 0.5834 | 0.6433 | 0.6487 | 0.6297 |
| PFDA       | 0.3509 | 0.3506 | 0.308  | 0.3601 |
| PFUnA      | 0.2178 | 0.1996 | 0.1825 | 0.1882 |

**ID# 51**

| Sample #   | 1      | 2      | 3      | 4      |
|------------|--------|--------|--------|--------|
| Sample Day | 1      | 8      | 20     | 23     |
| PFOS       | 4.485  | 2.784  | 3.338  | 3.584  |
| PFOA       | 1.113  | 1.284  | 1.071  | 1.01   |
| PFHxS      | 0.6818 | 0.7596 | 0.6459 | 0.6594 |
| PFNA       | 0.3189 | 0.3865 | 0.2779 | 0.3176 |
| PFDA       | 0.221  | 0.2967 | 0.2086 | 0.1584 |
| PFUnA      | 0.1504 | 0.1658 | 0.133  | 0.1352 |
